# Supplementary material for: Not the same thing: metastatic PTCs have a different background than ATCs
Source: PubMed Central journal article supplement — Endocr Connect. 2018 Oct 30;7(12):1370–9. doi: 10.1530/EC-18-0386 (PMC6280609; doi:10.1530/ec-18-0386), 2018-10-30
Supplement: EC-18-0386-t001.pdf [file EC-18-0386-t001.pdf]

| Case            | Sex | Age (ys) | Histology | FU (months) | FU (event) | Mutated Gene (NGS panel)       |
|-----------------|-----|----------|-----------|-------------|------------|--------------------------------|
| <u>DM-PTC01</u> | M   | 90       | TCV-PTC   | 13          | DOD        | <u>NS</u>                      |
| <u>DM-PTC02</u> | M   | 74       | C-PTC     | 34          | DOD        | <u>NMD</u>                     |
| <u>DM-PTC03</u> | F   | 83       | C-PTC     | 52          | DOD        | <i>BRAF</i>                    |
| <u>DM-PTC04</u> | M   | 80       | TCV-PTC   | 148         | DOD        | <i>BRAF, TERT</i>              |
| <u>DM-PTC05</u> | F   | 79       | TCV-PTC   | 146         | DOD        | <u>NS</u>                      |
| <u>DM-PTC06</u> | M   | 73       | ST-PTC    | 71          | DOD        | <i>TERT</i>                    |
| <u>DM-PTC07</u> | F   | 72       | FV-PTC    | 167         | AWD        | <i>TERT</i>                    |
| <u>DM-PTC08</u> | F   | 72       | TCV-PTC   | 28          | DOD        | <i>TERT</i>                    |
| <u>DM-PTC09</u> | M   | 72       | FV-PTC    | 121         | DOD        | <u>NS</u>                      |
| <u>DM-PTC10</u> | M   | 71       | TCV-PTC   | 3           | DOD        | <u>NS</u>                      |
| <u>DM-PTC11</u> | F   | 71       | C-PTC     | 120         | DOD        | <u>NS</u>                      |
| <u>DM-PTC12</u> | F   | 71       | TCV-PTC   | 70          | DOD        | <i>BRAF, MET, PIK3CA, TERT</i> |
| <u>DM-PTC13</u> | F   | 69       | TCV-PTC   | 195         | DOD        | <u>NS</u>                      |
| <u>DM-PTC14</u> | F   | 68       | C-PTC     | 93          | DOD        | <i>BRAF</i>                    |
| <u>DM-PTC15</u> | F   | 68       | ST-PTC    | 117         | DOD        | <u>NS</u>                      |
| <u>DM-PTC16</u> | F   | 67       | C-PTC     | NA          | NA         | <u>NS</u>                      |
| <u>DM-PTC17</u> | F   | 66       | TCV-PTC   | 130         | DOD        | <i>TERT</i>                    |
| <u>DM-PTC18</u> | F   | 65       | FV-PTC    | 170         | DOD        | <i>TERT</i>                    |
| <u>DM-PTC19</u> | M   | 64       | FV-PTC    | 217         | DOD        | <u>NS</u>                      |
| <u>DM-PTC20</u> | M   | 63       | C-PTC     | 35          | DOD        | <u>NMD</u>                     |
| <u>DM-PTC21</u> | F   | 63       | C-PTC     | 77          | AWD        | <i>BRAF, TERT</i>              |
| <u>DM-PTC22</u> | F   | 63       | TCV-PTC   | 130         | DOD        | <u>NS</u>                      |
| <u>DM-PTC23</u> | M   | 63       | TCV-PTC   | 36          | DOD        | <u>NS</u>                      |
| <u>DM-PTC24</u> | M   | 61       | FV-PTC    | 236         | AWD        | <u>NS</u>                      |
| <u>DM-PTC25</u> | F   | 61       | FV-PTC    | 175         | DOD        | <u>NS</u>                      |
| <u>DM-PTC26</u> | M   | 61       | TCV-PTC   | 91          | DOD        | <i>BRAF, MED12, TERT</i>       |
| <u>DM-PTC27</u> | F   | 59       | C-PTC     | 230         | AWD        | <u>NS</u>                      |
| <u>DM-PTC28</u> | F   | 59       | TCV-PTC   | 63          | DOD        | <i>BRAF, MET, TERT</i>         |
| <u>DM-PTC29</u> | F   | 58       | TCV-PTC   | 67          | DOD        | <i>GNAS, TERT</i>              |
| <u>DM-PTC30</u> | M   | 47       | C-PTC     | 24          | AWD        | <i>Myc</i>                     |
| <u>DM-PTC31</u> | F   | 54       | FV-PTC    | 143         | AWD        | <u>NMD</u>                     |
| <u>DM-PTC32</u> | F   | 53       | C-PTC     | 57          | DOD        | <u>NS</u>                      |
| <u>DM-PTC33</u> | F   | 51       | C-PTC     | 102         | AWD        | <i>BRAF, TERT</i>              |
| <u>DM-PTC34</u> | M   | 47       | TCV-PTC   | 63          | DOD        | <i>MED12</i>                   |
| <u>DM-PTC35</u> | F   | 45       | C-PTC     | 178         | AWD        | <u>NMD</u>                     |
| <u>DM-PTC36</u> | F   | 45       | C-PTC     | 173         | NED        | <u>NS</u>                      |
| <u>DM-PTC37</u> | F   | 34       | C-PTC     | 162         | AWD        | <i>BRAF</i>                    |
| <u>DM-PTC38</u> | M   | 34       | C-PTC     | 234         | NED        | <u>NMD</u>                     |
| <u>DM-PTC39</u> | F   | 29       | C-PTC     | 413         | AWD        | <u>NS</u>                      |
| <u>DM-PTC40</u> | M   | 29       | C-PTC     | 173         | AWD        | <u>NMD</u>                     |
| <u>DM-PTC41</u> | F   | 28       | TCV-PTC   | 136         | NED        | <u>NS</u>                      |
| <u>DM-PTC42</u> | M   | 27       | C-PTC     | 220         | NED        | <i>TERT</i>                    |
| <u>DM-PTC43</u> | F   | 22       | C-PTC     | 144         | AWD        | <u>NMD</u>                     |
| <u>DM-PTC44</u> | F   | 19       | C-PTC     | 32          | AWD        | <u>NMD</u>                     |
| <u>DM-PTC45</u> | F   | 19       | C-PTC     | 26          | AWD        | <i>BRAF</i>                    |
| <u>DM-PTC46</u> | M   | 17       | C-PTC     | NA          | NA         | <u>NMD</u>                     |
| <u>DM-PTC47</u> | F   | 58       | C-PTC     | 19          | DOD        | <u>NS</u>                      |

|          |   |    |       |    |     |                   |
|----------|---|----|-------|----|-----|-------------------|
| DM-PTC48 | F | 63 | C-PTC | 50 | DOD | <i>BRAF, TERT</i> |
|----------|---|----|-------|----|-----|-------------------|

**Supplementary Table 1. DM\_ Patient Features**

Abbreviations: C-PTC- Classical PTC, TCV-PTC-Tall Cell Variant PTC, FV- Follicula Variant-PTC, DOD-Dead of Disease, AWD-Alive with disease, NED- no evidence of disease, DOC-dead of other causes, NA- not available, NMD-no mutations detected, NS- Not Sequenced (due to low amount or quality of DNA)
