# Supplementary material for: Not the same thing: metastatic PTCs have a different background than ATCs
Source: PubMed Central journal article supplement — Endocr Connect. 2018 Oct 30;7(12):1370–9. doi: 10.1530/EC-18-0386 (PMC6280609; doi:10.1530/ec-18-0386), 2018-10-30
Supplement: EC-18-0386-t002.pdf [file EC-18-0386-t002.pdf]

| Case | Sex | Age | Histology | FU (months) | FU (event) | Mutated Gene (NGS panel)                    |
|------|-----|-----|-----------|-------------|------------|---------------------------------------------|
| AT1  | M   | 72  | ATC       | NA          | NA         | <i>GNAS, TP53</i>                           |
| AT2  | M   | 58  | ATC       | NA          | NA         | <i>TERT</i>                                 |
| AT3  | M   | 67  | ATC       | 78          | DOC        | <i>NMD</i>                                  |
| AT5  | F   | 84  | ATC       | NA          | NA         | <i>NRAS</i>                                 |
| AT6  | F   | 80  | ATC       | 38          | DOD        | <i>PTEN</i>                                 |
| AT9  | F   | 70  | ATC       | 2           | DOD        | <i>PIK3CA, PTEN</i>                         |
| AT10 | F   | 73  | ATC       | 195         | DOC        | <i>TERT, TP53</i>                           |
| AT13 | F   | 63  | ATC       | 2           | DOD        | <i>IDH1, PDGFR<math>\alpha</math>, TERT</i> |
| AT14 | F   | 65  | ATC       | 1           | DOD        | <i>TERT, TP53</i>                           |
| AT15 | M   | 47  | ATC       | 23          | DOD        | <i>TERT, TP53</i>                           |
| AT16 | F   | 74  | ATC       | NA          | NA         | <i>NRAS, TERT, TP53</i>                     |
| AT17 | M   | 80  | ATC       | 3           | DOD        | <i>TERT, TP53</i>                           |
| AT18 | F   | 82  | ATC       | 2           | DOD        | <i>BRAF</i>                                 |
| AT19 | M   | 78  | ATC       | 5           | DOD        | <i>IDH1, TP53</i>                           |
| AT20 | M   | 74  | ATC       | 10          | DOD        | <i>PIK3CA, TERT, TP53</i>                   |
| AT21 | F   | 56  | ATC       | 2           | DOD        | <i>GNAS, TERT</i>                           |
| AT22 | F   | 63  | ATC       | NA          | AWD        | <i>TERT, TP53</i>                           |
| AT23 | F   | 84  | ATC       | 3           | DOD        | <i>GNAS, TERT, TP53</i>                     |

**Supplementary Table 2. ATC\_ Patient Features**

Abbreviations: C-PTC- Classical PTC, TCV-PTC-Tall Cell Variant PTC, FV- Follicula Variant-PTC, DOD-Dead of Disease, AWD-Alive with disease, NED- no evidence of disease, DOC-dead of other causes, NA- not available, NP- NMD: no mutations detected,
