# Supplementary material for: Not the same thing: metastatic PTCs have a different background than ATCs
Source: PubMed Central journal article supplement — Endocr Connect. 2018 Oct 30;7(12):1370–9. doi: 10.1530/EC-18-0386 (PMC6280609; doi:10.1530/ec-18-0386), 2018-10-30
Supplement: EC-18-0386-t003.pdf [file EC-18-0386-t003.pdf]

| Case  | Sex | Age | Histology | FU (months) | Fu (event) | Mutated Gene (NGS panel) |
|-------|-----|-----|-----------|-------------|------------|--------------------------|
| N0-01 | F   | 43  | C-PTC     | 141         | NED        | <i>BRAF, MED12</i>       |
| N0-02 | F   | 61  | C-PTC     | 151         | NED        | <u>NMD</u>               |
| N0-03 | F   | 67  | C-PTC     | 84          | NED        | <u>NS</u>                |
| N0-04 | F   | 60  | C-PTC     | 156         | NED        | <i>BRAF</i>              |
| N0-05 | F   | 55  | C-PTC     | 158         | NED        | <i>BRAF</i>              |
| N0-06 | F   | 44  | C-PTC     | 138         | NED        | <i>BRAF</i>              |
| N0-07 | F   | 43  | C-PTC     | 98          | NED        | <i>BRAF</i>              |
| N0-08 | F   | 64  | C-PTC     | 77          | NED        | <u>NMD</u>               |
| N0-09 | F   | 66  | C-PTC     | 175         | NED        | <u>NMD</u>               |
| N0-10 | F   | 51  | C-PTC     | 147         | NED        | <u>NMD</u>               |
| N0-11 | F   | 66  | C-PTC     | 125         | NED        | <u>NMD</u>               |
| N0-12 | F   | 59  | C-PTC     | 204         | NED        | <u>NMD</u>               |
| N0-13 | F   | 51  | C-PTC     | 161         | NED        | <i>MED12</i>             |
| N0-14 | F   | 53  | C-PTC     | 155         | NED        | <i>BRAF</i>              |
| N0-15 | F   | 57  | C-PTC     | 108         | NED        | <u>NS</u>                |
| N0-16 | F   | 62  | C-PTC     | NA          | NA         | <u>NS</u>                |
| N0-17 | F   | 63  | C-PTC     | 144         | NED        | <u>NS</u>                |
| N0-18 | M   | 33  | TCV-PTC   | 204         | NED        | <i>MED12</i>             |
| N0-19 | F   | 68  | FV-PTC    | NA          | NA         | <i>c-Kit, GNAS</i>       |
| N0-20 | F   | 53  | C-PTC     | 85          | NED        | <u>NMD</u>               |
| N0-21 | F   | 63  | C-PTC     | 100         | NED        | <i>BRAF</i>              |
| N0-22 | F   | 38  | C-PTC     | 119         | NED        | <u>NMD</u>               |
| N0-23 | F   | 69  | FV-PTC    | 118         | NED        | <i>BRAF</i>              |
| N0-24 | M   | 39  | C-PTC     | 216         | NED        | <u>NMD</u>               |
| N0-25 | F   | 53  | C-PTC     | 87          | NED        | <u>NMD</u>               |
| N0-26 | M   | 22  | ST-PTC    | 114         | NED        | <u>NMD</u>               |
| N0-27 | F   | 61  | TCV-PTC   | 129         | NED        | <i>BRAF</i>              |
| N0-28 | M   | 60  | C-PTC     | 120         | NED        | <i>BRAF, MED12</i>       |
| N0-29 | F   | 64  | C-PTC     | 86          | NED        | <i>BRAF, TP53</i>        |
| N0-30 | M   | 58  | C-PTC     | NA          | NA         | <i>PIK3CA</i>            |
| N0-31 | F   | 50  | C-PTC     | 96          | NED        | <u>NS</u>                |
| N0-32 | F   | 64  | C-PTC     | 103         | NED        | <i>BRAF, IDH1, MET</i>   |
| N0-33 | F   | 67  | FV-PTC    | 160         | NED        | <i>BRAF, TP53</i>        |
| N0-34 | M   | 59  | FV-PTC    | 184         | NED        | <i>EGFR</i>              |
| N0-35 | F   | 54  | C-PTC     | 175         | NED        | <u>NMD</u>               |
| N0-36 | F   | 61  | C-PTC     | 103         | NED        | <i>BRAF</i>              |
| N0-37 | F   | 56  | C-PTC     | 118         | NED        | <u>NMD</u>               |

### Supplementary Table 3. Ctrl\_N0\_Patient Features

Abbreviations: C-PTC- Classical PTC, TCV-PTC-Tall Cell Variant PTC, FV- Follicula Variant-PTC, DOD-Dead of Disease, AWD-Alive with disease, NED- no evidence of disease, DOC-dead of other causes, NA- not available, NMD- no mutations detected, NS- Not Sequenced (due to low amount or quality of DNA)
